# Supplementary material
Source: PubMed Central journal article supplement (PMC9481984)
Supplement: mmc1.pdf [file mmc1.pdf]

YMTHE, Volume 30

## **Supplemental Information**

### **Broadening prime editing toolkits using RNA-Pol-II-driven engineered pegRNA**

**Shisheng Huang, Zhenwu Zhang, Wanyu Tao, Yao Liu, Xiangyang Li, Xiaolong Wang, Javad Harati, Peng-Yuan Wang, Xingxu Huang, and Chao-Po Lin**

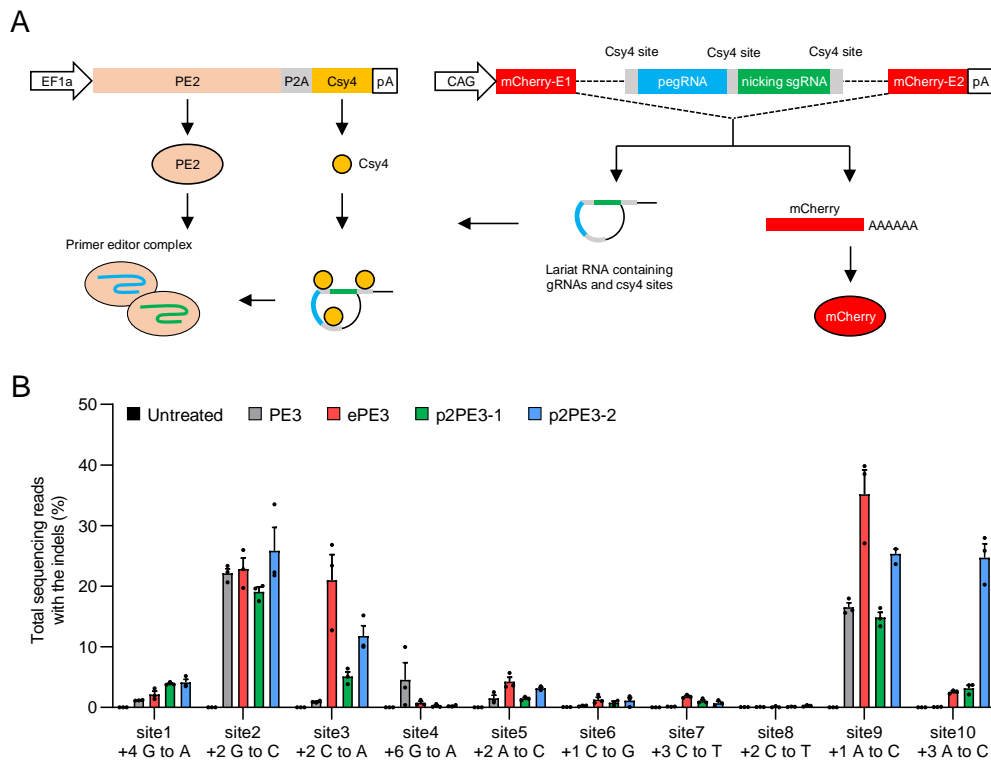

**Figure S1. Analysis of pol II-mediated transcription of pegRNA editing system. (A)** A diagram shown how functional pegRNAs were generated from introns in pol II-mediated transcripts. mCherry was used as the harboring gene. A P2A peptide was used to link Csy4 with PE2. E: Exon. **(B)** Comparison of indels with PE3, ePE3, p2PE3-1 and p2PE3-2 at ten endogenous target sites in HEK293T cells. Data were represented as the mean  $\pm$  SEM ( $n = 3$  from independent experiments).

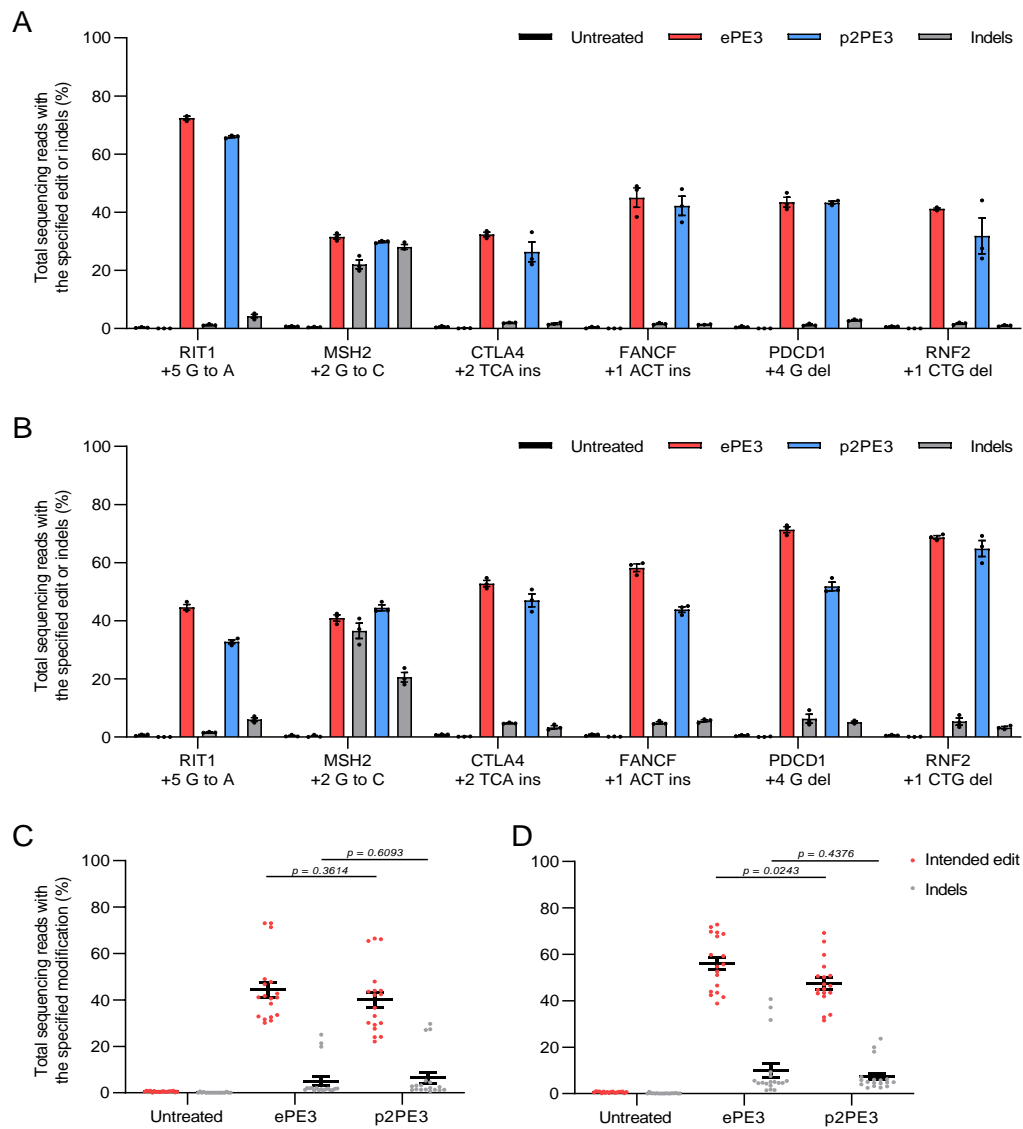

**Figure S2. The performance of ePE3 and p2PE3 in U2OS and HeLa.** (A, B) Comparison of editing and indel frequencies with ePE3 and p2PE3 targeting 6 individual sites (2 substitutions, 2 insertions and 2 deletions) in U2OS (A) and HeLa (B) cells. (C, D) Statistical analysis of intended editing and indel frequencies in U2OS (C) and HeLa (D) cells. Data were represented as the mean  $\pm$  SEM ( $n = 3$  from independent experiments). Two-tailed Student's t-tests were performed.

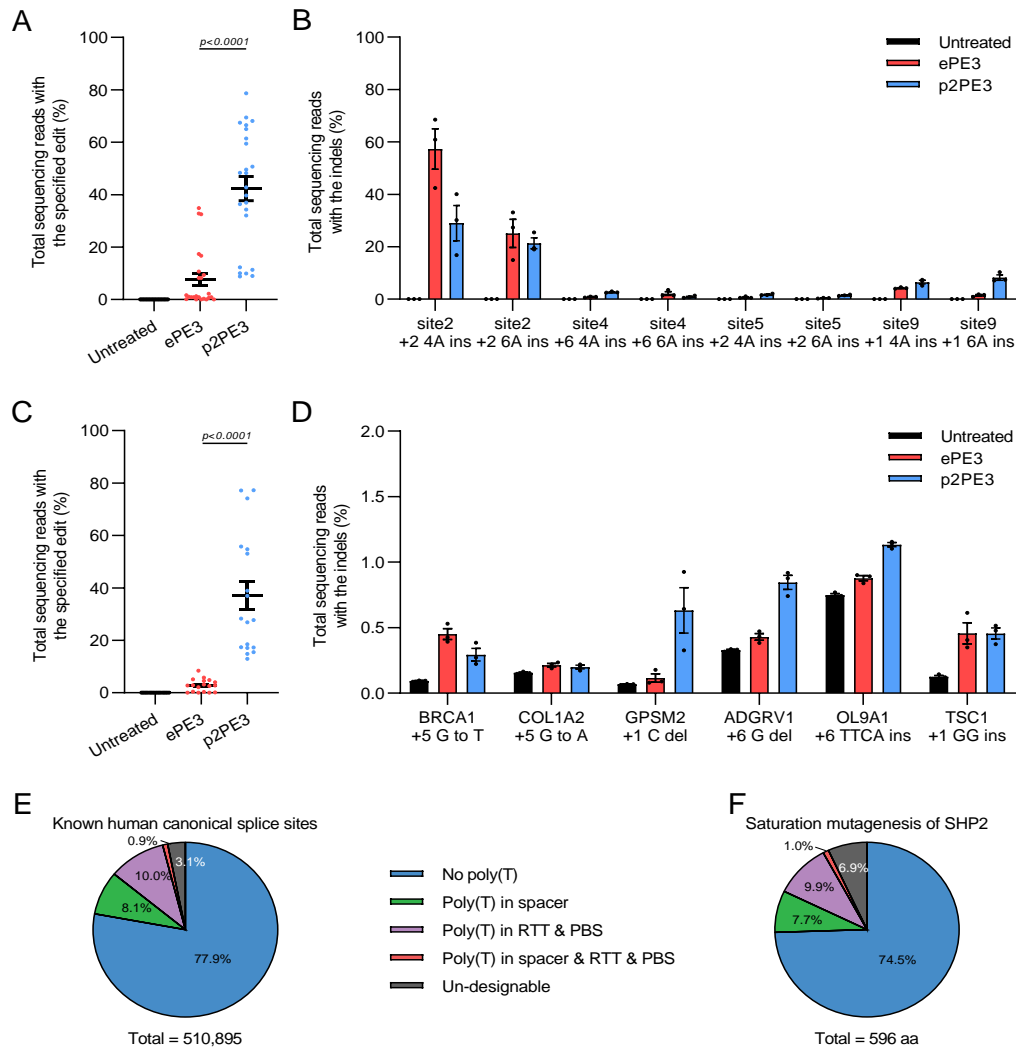

**Figure S3. Analysis of ePE3 and p2PE3-mediated editing with pegRNA containing poly(T).** (A, B) Summary of editing efficiency (A) and indels (B) of ePE3 and p2PE3-mediated insertions of poly(A) at four endogenous target sites in HEK293T cells. (C, D) Summary of editing efficiency (C) and indels (D) of ePE3 and p2PE3-mediated editing with pegRNA containing poly(T) at six human pathogenic sites in HEK293T cells. Data and error bars indicated the mean  $\pm$  SEM of three independent experiments. Two-tailed Student's t-tests were performed. (E) The proportion of pegRNA containing poly(T) to target known human canonical splice sites. (F) the proportion of poly(T) in the pegRNAs targeting SHP2 gene to make saturation mutagenesis library.

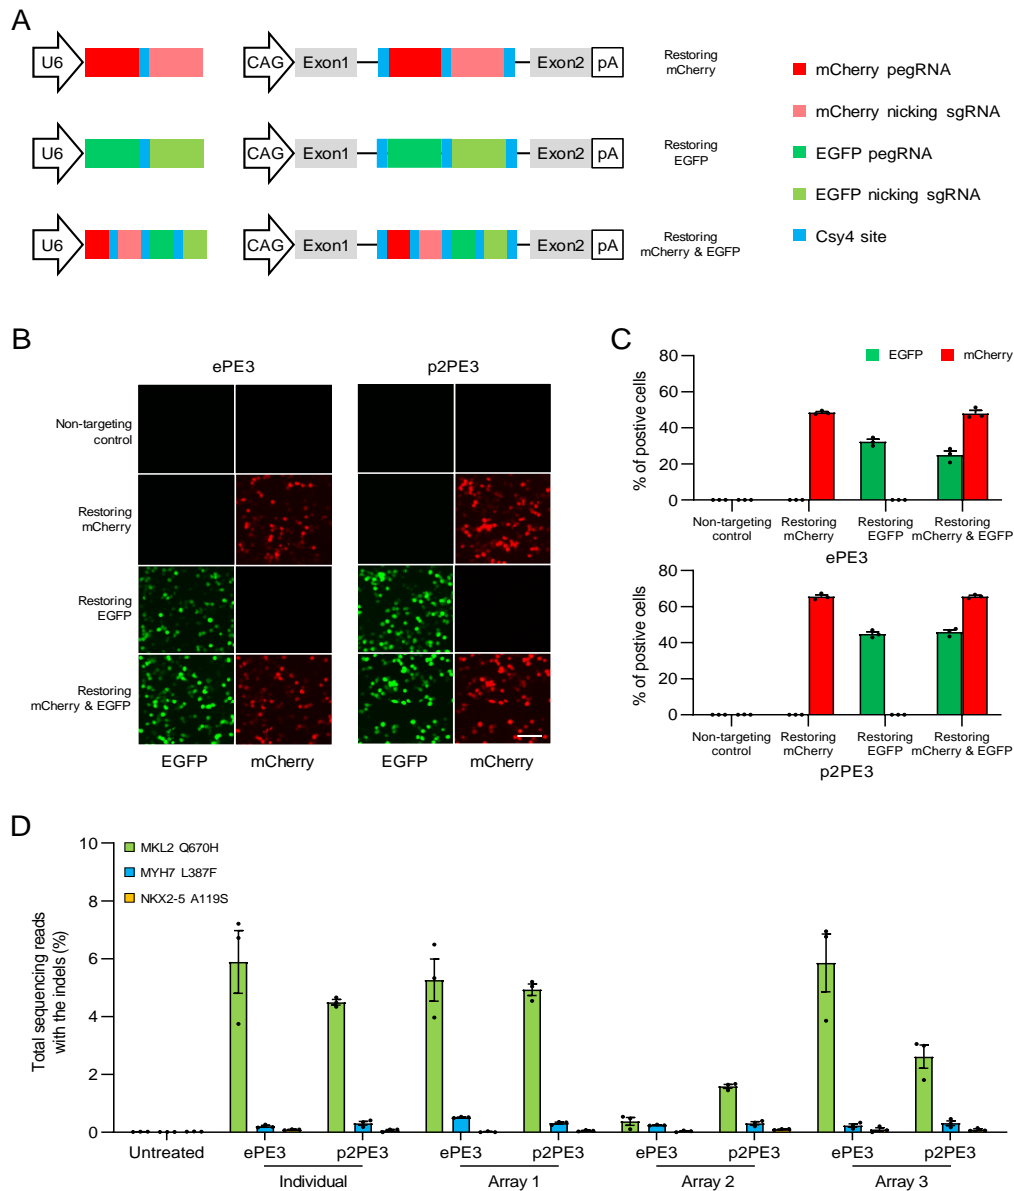

**Figure S4. The performance of ePE3 and p2PE3 in combinatorial genetic editing.** (A) Diagram of the pegRNA-nicking sgRNA cassettes restoring the fluorescence of mCherry, EGFP or the dual-color fluorescence. Harboring gene of p2PE3 was replaced with irrelevant transcript. (B) The fluorescence of restored mCherry and EGFP determined by microscope images. *Scale bars*, 100  $\mu$ m. (C) Analysis of fluorescence by flow cytometry. Additional blue fluorescent protein (BFP) fluorescence was used to indicate cell transfection. The percentage was calculated as the number of positive cells/total transfected cells. (D) Indels of ePE3 and p2PE3 to model childhood-onset cardiomyopathy mutations. Data were represented as the mean  $\pm$  SEM (n = 3 from three independent experiments).

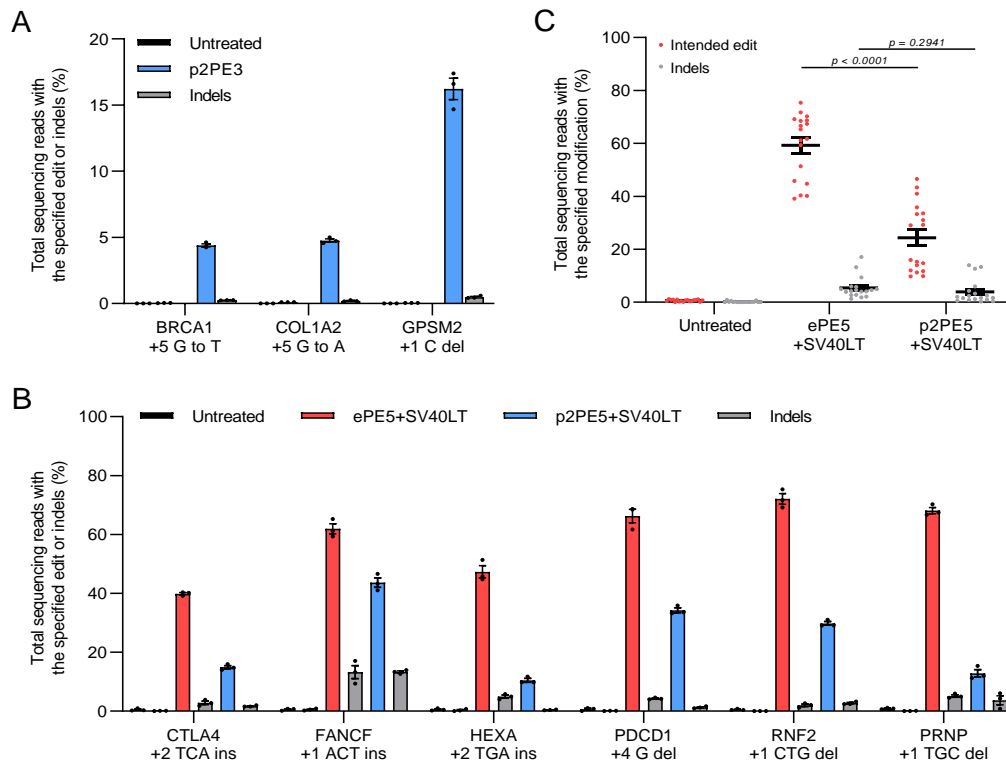

**Figure S5. The comparison of editing efficiency of ePE3 and p2PE3 in hESCs.** (A) Efficiency of p2PE3-mediated base substitution and small targeted deletion in hESCs. (B) Comparison of editing and indel frequencies with ePE3 and p2PE3 targeting 6 individual sites (2 substitutions, 2 insertions and 2 deletions) in the presence of hMLH1<sup>NTD</sup>-NLS and SV40LT (ePE5+SV40LT and p2PE5+SV40LT) in hESCs. (C) Statistical analysis of intended editing and indel frequencies in (B). Data were represented as the mean  $\pm$  SEM ( $n = 3$  from independent experiments). Two-tailed Student's *t*-tests were performed.

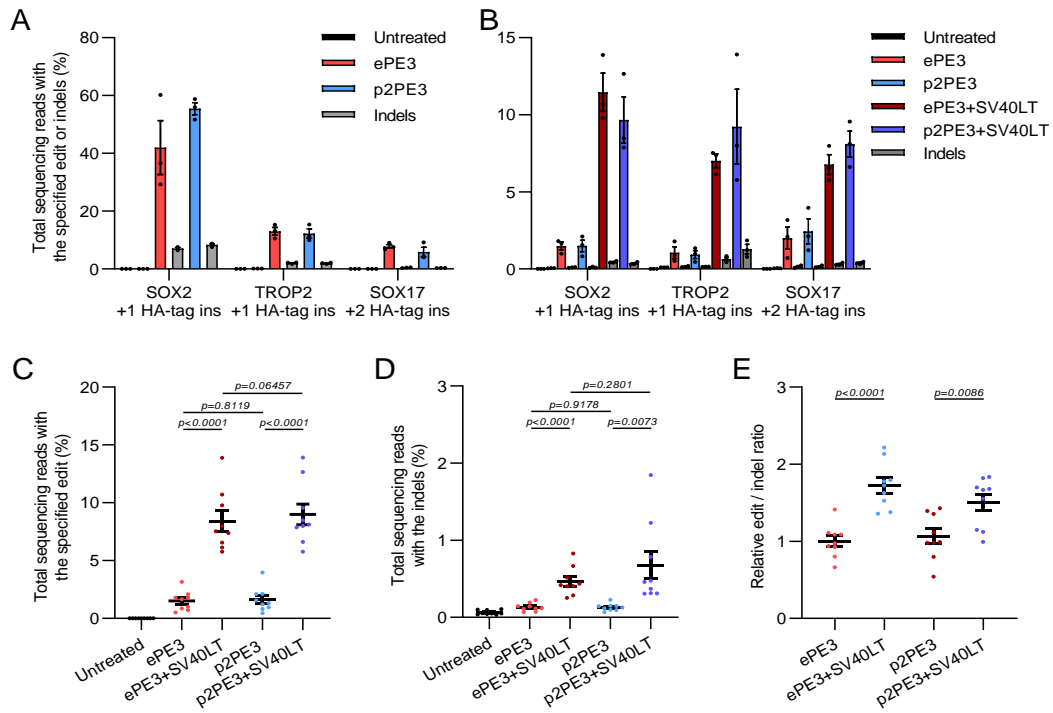

**Figure S6. Editing efficiency of long targeted insertions.** (A) Efficiency of ePE3 and p2PE3-mediated long targeted insertion (HA-tag insertion, 27 bp) in HEK293T. (B) Transient p53 inhibition increased efficiency of ePE3 and p2PE3-mediated long targeted insertion in hESCs. (C, D) Statistical analysis of the editing frequency (C) and indels (D) in (B). (E) Relative edit:indel ratios associated with ePE3 and p2PE3-mediated editing enhanced by SV40LT. The levels of the ePE3 group were set as 1. The results correspond to those shown in (B). Data were represented as the mean  $\pm$  SEM ( $n = 3$  from independent experiments). Two-tailed Student's *t*-tests were performed.

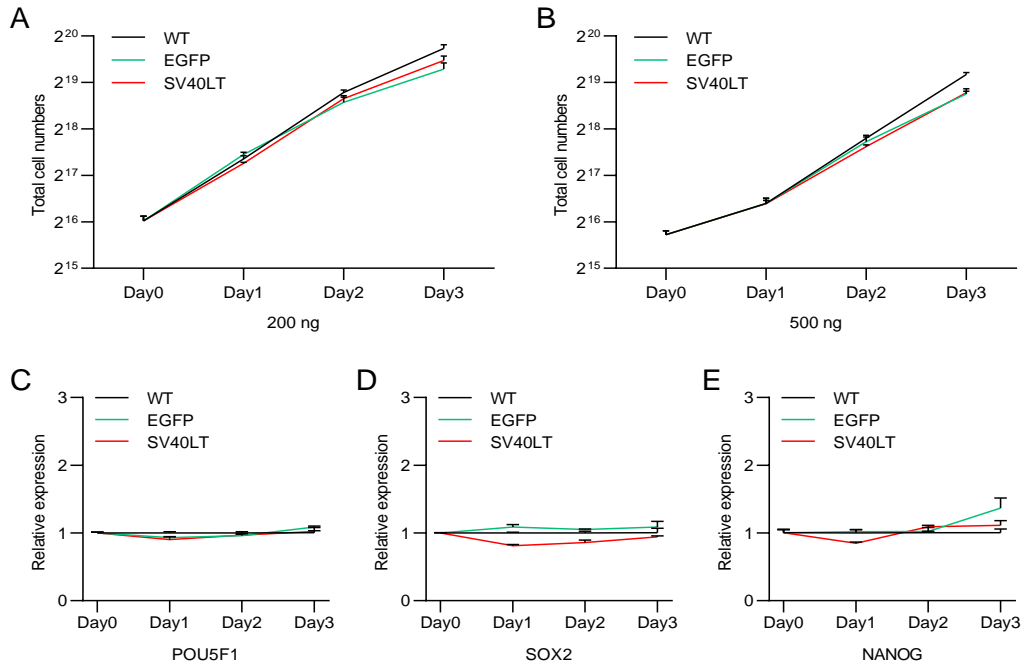

**Figure S7. Evaluating the effect of p53 inhibition on hESCs.** (A, B) Cells were assayed for growth 0, 24, 48 and 72 h after transfection with 200 ng (A) or 500 ng (B) of EGFP or SV40LT expression plasmid. (C, D, E) The expression of stemness gene at different time points in (B). Data were represented as the mean  $\pm$  SEM ( $n = 3$  from independent experiments).



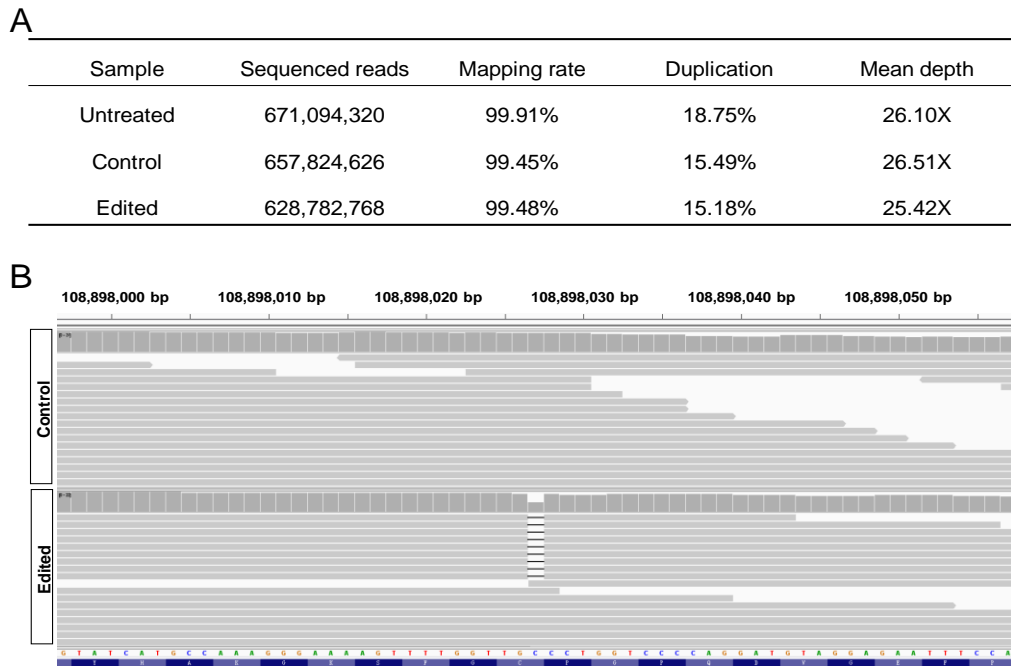

**Figure S8. The information of whole genome sequencing.** (A) Sequencing statistics of whole genome sequencing samples. Control: H1 hESCs were transfected with EGFP plasmid; Edited: H1 hESCs were transfected with pEF1a-PE2-P2A-Csy4, p2PE3 gRNA cassette targeting GPSM2 site and pEF1a-SV40LT-P2A-hMLH1<sup>NTD</sup>-NLS plasmids. (B) Confirmation of the on-target editing (GPSM2 +1 C del) by analyzing the whole-genome sequencing results.

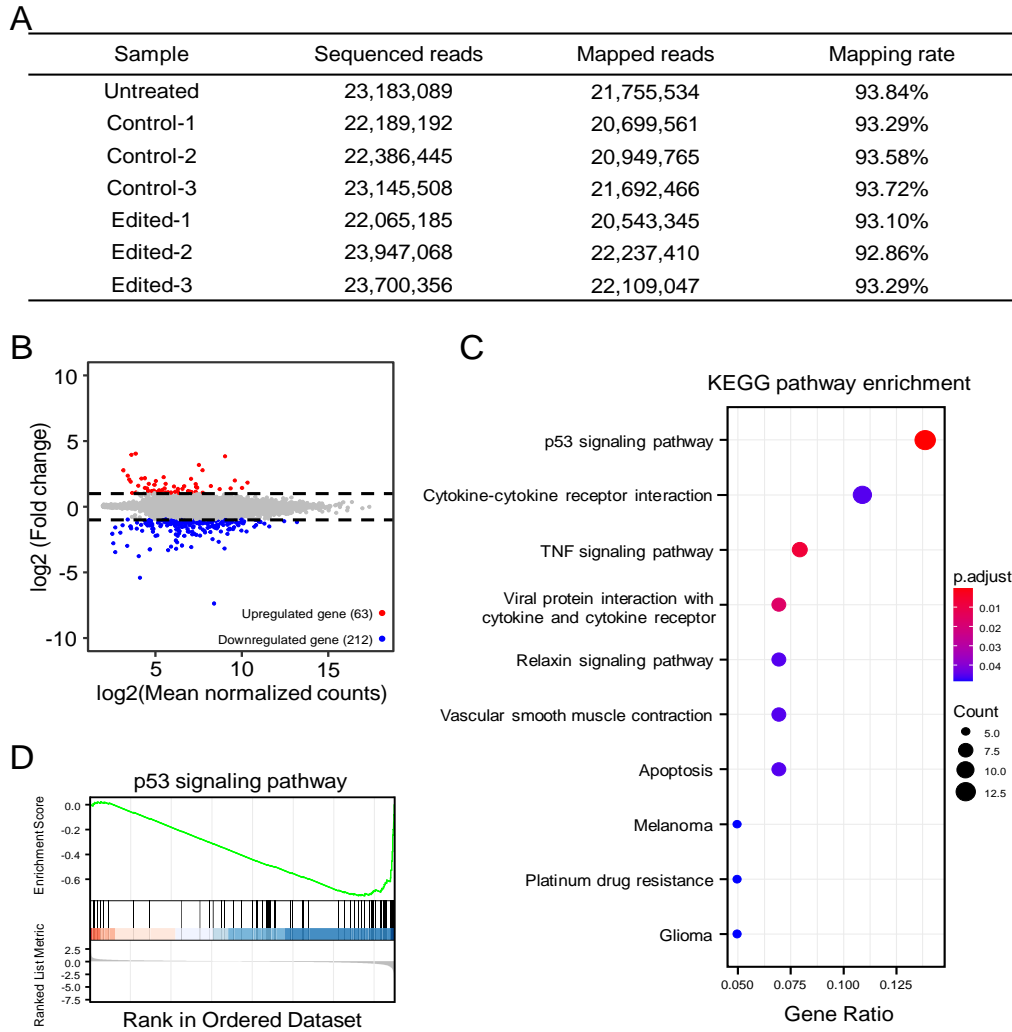

**Figure S9. The differential expression analysis of RNA sequencing.** (A) Sequencing statistics of RNA sequencing samples. Control: H1 hESCs were transfected with EGFP plasmid; Edited: H1 hESCs were transfected with pEF1a-PE2-P2A-Csy4, p2PE3 gRNA cassette targeting GPSM2 site and pEF1a-SV40LT-P2A-hMLH1<sup>NTD</sup>-NLS plasmids. (B) The differentially expressed genes of edited samples comparing with control. (C) A dot plot to visualize the rich KEGG pathway from the differentially expressed genes. (D) The GSEA enrichment plot showed down-regulation of p53 signaling pathway in edited samples.

**Table S2. Primers used in this study**

| Name       | Forward primer         | Reverse primer          |
|------------|------------------------|-------------------------|
| site1      | GTATGGAAAGGTAAGGCACTG  | TCCATGCTTCCTGTCAAATGG   |
| site2      | CTCAGCATTCACTGCTCTCC   | TCGCATTTGCACTAGTCCTC    |
| site3      | GGCTGAGAGGACTGATCTTTCT | TCGACCTCGAGGAGACAATG    |
| site4      | ACGTAGGAATTTTGGTGGGAC  | GTTTACACGTCTCATATGCC    |
| site5      | GAGCCCTCACTTTGGGTGTT   | CCTCATTGCCAATGGATCAG    |
| site6      | CTCTAGGTGATGCTCAAGATG  | ATTTTGGGCAAGTCTGCCT     |
| site7      | AGAAAACAGGATGACCCCGATG | GACATTGTGGCCATCATTCC    |
| site8      | ACGTTGAGCTGTGCAGAGAA   | TTGAAGCCAACCCACACAGT    |
| site9      | GGCAAACAAGGGAGTAATTC   | AGAGAGACGGGAAGCCATTG    |
| site10     | CTGCTGGGAGATGTAGTCCAT  | TTTGTGCGGTGCGGTAACA     |
| BRCA1      | TAGCTTCTTAGGACAGCACTTC | GGTAACTCAGACTCAGCATCAG  |
| COL1A2     | ACAGAAACCACAGACTAGGGA  | GTGTGGTTCTTAGATGAATGCT  |
| GPSM2      | CAGATTAGGTAGCATGTCTCTC | AGTCAGCTGTGGGACAATC     |
| ADGRV1     | GCAGCTGTCTCTGAAAGATA   | GAAAGCCGCCTATCGGAAAG    |
| OL9A1      | GATGTCTTCATTTAGTGGGAGA | CTTAGATGGGCTCATGACTG    |
| TSC1       | GGCACATTGGTCTTTGAACC   | TGGTATGGAGCACTCTGTTG    |
| MKL2       | CTTGGCTCCTCCATCAAAGAT  | CTGCGTGGTCAGTAAAGCCT    |
| MYH7       | TTCATCCCACCATGCCAGT    | ACCAACTTTGCTACTTGCCT    |
| NKX2-5     | CCTCCACGAGGATCCCTTAC   | GGTACCCTGCTGCTTGAA      |
| SOX2       | TTCACATGTCCCAGCACTAC   | TCATTTGCTGTGGGTGATGG    |
| TROP2      | GCTGCACACGGTCATCTTG    | CCTGCAGACCATCCAGA       |
| SOX17      | TGGGTACGCTGTAGACCAGA   | TCTGGTCGTCAGTGGCGTAT    |
| RIT1       | GTATGGAAAGGTAAGGCACTG  | TCCATGCTTCCTGTCAAATGG   |
| MSH2       | CTCAGCATTCACTGCTCTCC   | TCGCATTTGCACTAGTCCTC    |
| CTLA4      | ATGCATCTCCAGGCAAAGCC   | CTTGCAGATGTAGAGTCCCG    |
| FANCF      | CCTGCGCCACATCCATCGGC   | TGCACCAGGTGGTAACGAGC    |
| HEXA       | GAGAGCTCGCCAAACATCGC   | CCTGTTCTTGCCAGCAGGGC    |
| PDCD1      | GCACTGCCTCTGTCACTCT    | CCGACCCACCTACCTAAGA     |
| PRNP       | TGAGCAGCTGATACCATTGC   | GCGGTTGCCTCCAGGGCTGC    |
| RNF2       | CCTCGCTCGCTCGCTCCTTC   | CAGCCCAGGGCTCCGCTGGC    |
| GAPDH-qPCR | GGCCCCCTCAAGGGCATCCT   | GGGCCATGAGGTCCACCACC    |
| NANOG-qPCR | TGTTTGGGATTGGGAGGCTT   | GCACAACCAACAAATTAGGGGA  |
| OCT4-qPCR  | GTGGAGGAAGCTGACAACAATG | TCTCACTCGGTTCTCGATACTGG |
| SOX2-qPCR  | GACCAGCTCGCAGACCTACATG | ACTTGACCACCGAACCCATG    |
